# Supplementary material for: Chemical asymmetry and α and β polarizabilities of D-A-D′ chromophores: a three-state-model and TDDFT-SOS analysis of a penta-heptamethine ketocyanine
Source: Royal Society of Chemistry journal article supplement (doi:10.1039/c2cp23379g), 2012-01-01
Supplement: c2cp23379g.pdf [file c2cp23379g.pdf]

## Supporting Information

**Table S1-** Properties of the ground state and the 11 lowest-lying  $^1\pi\pi^*$  states of KC<sub>2,3</sub> calculated at the TDDFT-B3LYP/6-31G\*\* level. Labels indicate the serial number of each  $^1\pi\pi^*$  state in the general excited state set. Column one reports the state energies referred to the ground state. The diagonal squares of the 12x12 matrix report the components of the state dipole moments. The squares of the upper triangle report the components of the transition dipole moments, while those of the lower triangle give the oscillator strengths.

| E/eV  | No | 0     | 1       | 3      | 4       | 5       | 7      | 8       | 9       | 10      | 12      | 15     | 17      | Pol. |
|-------|----|-------|---------|--------|---------|---------|--------|---------|---------|---------|---------|--------|---------|------|
| 0     | 0  | 1.007 | 12.368  | -0.745 | -6.320  | -2.916  | -0.327 | -0.963  | -1.726  | 1.504   | 0.678   | -0.164 | 0.323   | x    |
|       |    | 2.468 | -0.134  | -0.682 | 0.434   | -0.042  | 0.026  | 0.036   | 0.350   | 0.754   | -0.078  | 0.675  | 0.251   | y    |
| 2.993 | 1  | 3.916 | -24.910 | 6.697  | -4.786  | 6.403   | -3.578 | -1.892  | -2.090  | -0.177  | 1.523   | 0.289  | x       |      |
|       |    | 1.736 | 4.939   | -0.114 | -0.087  | -0.453  | 0.220  | 0.341   | 0.016   | -0.010  | -0.528  | -0.019 | -0.082  | y    |
| 3.344 | 3  | 0.013 | 0.826   | -6.363 | -17.258 | -10.606 | -0.523 | -4.530  | 6.632   | -3.701  | 0.628   | -0.731 | -1.400  | x    |
|       |    |       |         | 3.753  | -0.444  | -0.486  | -0.922 | 1.056   | -0.108  | -0.059  | 0.255   | 0.531  | 0.110   | y    |
| 4.288 | 4  | 0.653 | 0.220   | 1.067  | 12.356  | -6.983  | -6.911 | -0.743  | -15.997 | -9.769  | -2.464  | -0.135 | 0.094   | x    |
|       |    |       |         |        | 2.240   | -0.428  | 0.060  | 0.383   | -0.751  | 0.330   | -0.792  | 0.354  | 0.848   | y    |
| 4.560 | 5  | 0.147 | 0.137   | 0.520  | 0.051   | -11.908 | 7.374  | 5.894   | 4.863   | -13.258 | 0.310   | 1.500  | -4.032  | x    |
|       |    |       |         |        |         | 3.417   | 0.378  | -0.296  | -0.610  | 0.265   | -0.373  | -0.209 | 0.377   | y    |
| 4.747 | 7  | 0.002 | 0.242   | 0.006  | 0.083   | 0.039   | 12.376 | 3.660   | -11.970 | 3.312   | -11.147 | 6.801  | -2.573  | x    |
|       |    |       |         |        |         |         | 3.272  | 0.753   | -0.354  | -0.360  | -0.104  | 0.567  | -0.216  | y    |
| 5.323 | 8  | 0.019 | 0.114   | 0.162  | 0.003   | 0.094   | 0.030  | -19.513 | 3.376   | -3.525  | -2.075  | 4.624  | -15.956 | x    |
|       |    |       |         |        |         |         |        | 3.574   | -0.087  | 0.130   | 0.125   | -0.588 | -0.214  | y    |
| 5.512 | 9  | 0.065 | 0.034   | 0.362  | 1.190   | 0.081   | 0.416  | 0.008   | 14.865  | 9.018   | 0.557   | -4.812 | -2.802  | x    |
|       |    |       |         |        |         |         |        |         | 3.051   | -0.121  | -0.768  | 0.072  | 0.680   | y    |
| 5.832 | 10 | 0.063 | 0.047   | 0.129  | 0.559   | 0.794   | 0.046  | 0.024   | 0.099   | -19.259 | -3.509  | 0.110  | 6.085   | x    |
|       |    |       |         |        |         |         |        |         |         | 2.620   | 0.374   | -0.123 | -0.211  | y    |
| 5.987 | 12 | 0.011 | 0.004   | 0.005  | 0.043   | 0.036   | 0.584  | 0.011   | 0.002   | 0.007   | 17.646  | 3.382  | 6.117   | x    |
|       |    |       |         |        |         |         |        |         |         |         | 2.858   | 0.083  | 0.549   | y    |
| 6.196 | 15 | 0.011 | 0.028   | 0.009  | 0.001   | 0.014   | 0.256  | 0.072   | 0.060   | 0.000   | 0.009   | 9.889  | -4.159  | x    |
|       |    |       |         |        |         |         |        |         |         |         |         | 3.749  | -0.078  | y    |
| 6.372 | 17 | 0.010 | 0.001   | 0.023  | 0.006   | 0.113   | 0.041  | 1.016   | 0.027   | 0.076   | 0.055   | 0.012  | -8.991  | x    |
|       |    |       |         |        |         |         |        |         |         |         |         |        | 2.617   | y    |

**Table S2-** Properties of the ground state and the 10 lowest-lying  ${}^1\pi\pi^*$  states of KC2 calculated at the TDDFT-B3LYP/6-31G\*\* level. For other details see the legend of Table S1.

| E/eV               | No        | 0     | 2       | 3       | 4      | 6       | 7      | 8      | 11     | 12      | 19      | 20      | Pol.   |
|--------------------|-----------|-------|---------|---------|--------|---------|--------|--------|--------|---------|---------|---------|--------|
| 0<br>${}^1A_1$     | <b>0</b>  | 2.637 | -10.765 | 0.820   | -6.004 | -0.157  | -0.081 | 0.900  | -1.846 | -0.941  | -0.287  | -0.157  | x<br>y |
| 3.281<br>${}^1B_2$ | <b>2</b>  | 1.442 | 5.292   | -21.079 | 0.417  | 7.872   | 6.690  | 0.484  | -0.187 | -1.930  | -0.514  | -0.161  | x<br>y |
| 3.652<br>${}^1A_1$ | <b>3</b>  | 0.009 | 0.626   | 3.893   | 16.867 | 0.018   | -1.703 | -4.877 | -5.911 | -0.246  | 1.594   | 0.248   | x<br>y |
| 4.794<br>${}^1B_2$ | <b>4</b>  | 0.655 | 0.001   | 1.232   | 1.934  | -12.399 | 3.913  | -0.173 | -0.975 | 14.257  | 1.479   | 1.669   | x<br>y |
| 4.935<br>${}^1A_1$ | <b>6</b>  | 0.000 | 0.389   | 0.000   | 0.082  | 3.544   | -0.633 | -5.565 | 13.427 | -0.008  | -4.636  | 0.108   | x<br>y |
| 5.414<br>${}^1A_1$ | <b>7</b>  | 0.000 | 0.362   | 0.019   | 0.036  | 0.001   | 3.085  | 15.368 | 9.107  | -0.430  | -10.916 | -0.167  | x<br>y |
| 5.637<br>${}^1B_2$ | <b>8</b>  | 0.017 | 0.002   | 0.179   | 0.000  | 0.082   | 0.200  | 4.608  | 0.190  | -4.133  | 0.062   | -14.812 | x<br>y |
| 6.153<br>${}^1B_2$ | <b>11</b> | 0.080 | 0.000   | 0.331   | 0.005  | 0.833   | 0.232  | 0.000  | 3.654  | -13.702 | 1.224   | 4.524   | x<br>y |
| 6.385<br>${}^1A_1$ | <b>12</b> | 0.021 | 0.044   | 0.001   | 1.281  | 0.000   | 0.001  | 0.048  | 0.165  | 2.750   | -4.277  | 0.068   | x<br>y |
| 6.727<br>${}^1B_2$ | <b>19</b> | 0.002 | 0.003   | 0.030   | 0.016  | 0.146   | 0.593  | 0.000  | 0.003  | 0.024   | 2.129   | 14.840  | x<br>y |
| 6.842<br>${}^1A_1$ | <b>20</b> | 0.001 | 0.000   | 0.001   | 0.022  | 0.001   | 0.000  | 1.003  | 0.053  | 0.000   | 0.096   | 3.379   | x<br>y |

**Table S3-** Properties of the ground state and the 14 lowest-lying  $^1\pi\pi^*$  states of KC3 calculated at the TDDFT-B3LYP/6-31G\*\* level. For other details see the legend of Table S1.

| E/eV             | No | 0     | 1      | 3       | 4     | 5       | 7      | 8       | 9       | 10      | 11     | 12      | 16     | 17      | 18     | 19      | Pol.   |
|------------------|----|-------|--------|---------|-------|---------|--------|---------|---------|---------|--------|---------|--------|---------|--------|---------|--------|
| 0<br>$^1A_1$     | 0  | 2.322 | 13.610 | 0.620   | 8.227 | 0.336   | -0.114 | -1.726  | 2.900   | 0.649   | -0.022 | 0.828   | 0.272  | 0.156   | 0.101  | x<br>y  |        |
| 2.762<br>$^1B_2$ | 1  | 1.940 | 4.711  | 30.058  | 0.373 | 6.512   | -8.225 | 0.420   | -0.179  | -3.233  | -0.577 | 0.663   | 1.453  | 0.818   | -0.182 | x<br>y  |        |
| 3.084<br>$^1A_1$ | 3  | 0.004 | 1.105  | -24.219 | 3.762 | -0.404  | -1.218 | 5.461   | 9.559   | 0.214   | -0.797 | -0.322  | -0.673 | -0.305  | 0.126  | -2.745  | x<br>y |
| 3.952<br>$^1B_2$ | 4  | 1.015 | 0.001  | 1.931   | 2.042 | -16.802 | -3.748 | -0.187  | -1.038  | 21.335  | 0.855  | 0.824   | 0.549  | -0.179  | -4.789 | 0.767   | x<br>y |
| 4.133<br>$^1A_1$ | 5  | 0.002 | 0.221  | 0.001   | 0.194 | 3.288   | 0.497  | -11.899 | 14.632  | -0.082  | -2.027 | 0.167   | 0.385  | 3.461   | 0.503  | -2.921  | x<br>y |
| 4.567<br>$^1A_1$ | 7  | 0.000 | 0.461  | 0.008   | 0.033 | 0.004   | 2.604  | -17.924 | -16.691 | 13.197  | 0.370  | 0.050   | -1.153 | 6.201   | 0.011  | 0.591   | x<br>y |
| 4.627<br>$^1B_2$ | 8  | 0.052 | 0.001  | 0.174   | 0.000 | 0.265   | 0.073  | 4.083   | 0.202   | -7.934  | 0.069  | -18.992 | 9.471  | -0.120  | 0.153  | 0.367   | x<br>y |
| 5.121<br>$^1B_2$ | 9  | 0.163 | 0.000  | 0.706   | 0.005 | 0.802   | 0.585  | 0.000   | 2.737   | -20.868 | 1.203  | 5.142   | 3.630  | -0.078  | 14.525 | 0.635   | x<br>y |
| 5.305<br>$^1A_1$ | 10 | 0.019 | 0.101  | 0.000   | 2.335 | 0.000   | 0.000  | 0.162   | 0.304   | 2.687   | -5.738 | -0.033  | -0.091 | -2.588  | 0.021  | 17.833  | x<br>y |
| 5.588<br>$^1B_2$ | 11 | 0.009 | 0.004  | 0.006   | 0.005 | 0.023   | 0.674  | 0.000   | 0.003   | 0.035   | 2.199  | 22.461  | 3.323  | 0.010   | 0.382  | -0.034  | x<br>y |
| 5.621<br>$^1A_1$ | 12 | 0.000 | 0.005  | 0.001   | 0.004 | 0.000   | 0.000  | 1.360   | 0.050   | 0.000   | 0.063  | 2.897   | 0.081  | 5.280   | 0.332  | -12.717 | x<br>y |
| 5.989<br>$^1A_1$ | 16 | 0.016 | 0.026  | 0.004   | 0.002 | 0.001   | 0.007  | 0.463   | 0.043   | 0.000   | 0.002  | 0.000   | 3.218  | -19.120 | -0.300 | 1.112   | x<br>y |
| 6.174<br>$^1B_2$ | 17 | 0.002 | 0.000  | 0.001   | 0.000 | 0.093   | 0.234  | 0.000   | 0.000   | 0.022   | 0.000  | 0.058   | 0.256  | 3.981   | 11.923 | 0.472   | x<br>y |
| 6.254<br>$^1A_1$ | 18 | 0.001 | 0.009  | 0.000   | 0.199 | 0.002   | 0.000  | 0.000   | 0.906   | 0.000   | 0.000  | 0.000   | 0.000  | 0.043   | 3.036  | -16.070 | x<br>y |
| 6.259<br>$^1B_2$ | 19 | 0.000 | 0.000  | 0.091   | 0.005 | 0.069   | 0.002  | 0.001   | 0.002   | 1.150   | 0.000  | 0.391   | 0.001  | 0.000   | 0.005  | 2.472   | x<br>y |
